# Supplementary material for: Social Development with Public Value: An International Comparison
Source: Springer Nature journal article supplement (doi:10.1007/s11205-021-02805-5), 2022-01-01
Supplement: MOESM1 [file 19988814]

## Sheet: supplementary
Country Name	Country Code	GDPC	GDPR	GNIR	GCI	ELE	CPI	DEM	HFI	ROL	GPI	PPI	HDI	MYS	EYS	GIN	GIW	GGI	FSI	HAP	HPI	SWB	INE	EPI	EFP	CO2	PAI	ODI	LIF	MRT	IDI	POP
Aruba	ABW	29007.7	38442.4	36300																						8.42691						105366
Afghanistan	AFG	556.302	2202.57	2230			15	2.55		0.344517	3.567	3.997	0.49596	3.93	10.1389				105	3.36	20.2253	3.8	0.426557	37.74	0.727	0.245101	24	12.7402	64.486	15.1	0	36296400
Angola	AGO	4095.81	7310.9	6860		312.229	19	3.62	5.55988		2.116	3.852	0.574488	5.12546	11.7772	0.455667		0.64	87.8	3.866				37.44	1.015	1.20286	48	19.9207	60.782	23.6		29816748
Albania	ALB	4531.02	13037	13070	4.18499	2309.37	38	5.98	7.66039	0.507796	1.908	2.837	0.791406	10.0546	15.23	0.304	0.448	0.728	58.9	4.655	36.7669	5.5	0.165134	65.46	2.008	1.57716	100	0	78.458	13.6	4.08	2873457
Andorra	AND	38962.9											0.856781	10.1555	13.3002											6.07237	157	0	81.786			77001
United Arab Emirates	ARE	40644.8	67183.6	67670	5.29673	11088.4	71	2.69	6.3942	0.646405	1.944	2.329	0.866438	10.9541	13.6434	0.325		0.649	40.1	6.573				58.9	8.919	22.0408	134	0.0587	77.814	18.1		9487203
Argentina	ARG	14591.9	23562.9	22960	3.95094	3074.7	39	6.96	6.46254	0.581903	1.88	2.768	0.830096	10.565	17.6384	0.417438	0.723	0.732	46	6.65	35.1902	6.5	0.164238	59.3	3.365	4.61909	158		76.52	14	4.13	44044811
Armenia	ARM	3914.5	12115.1	12540	4.1915	1961.61	35	4.11	7.35737		2.22	3.061	0.760011	11.7939	13.1684	0.3263	0.583	0.677	66.7	4.36	25.6664	4.3	0.216648	62.07	1.935	1.75598	59	0	74.945	17.1	3.66	2944809
American Samoa	ASM	10823.4																										0.700868				55620
Antigua and Barbuda	ATG	15383.4	19840.1	18920						0.627294			0.776163	9.26309	12.4525				54.4					59.18	4.331	5.89656	135	0.264129	76.885	7.9		95426
Australia	AUS	54066.5	48905.4	47580	5.19151	10071.4	77	9.09	8.60257	0.808524	1.425	1.616	0.938379	12.683	22.1037	0.338	0.652	0.731	19.7	7.313	21.229	7.2	0.0806782	74.12	6.64	15.5392	171	0	83.281	5.6	5.36	24601860
Austria	AUT	47549.1	54637	54150	5.24665	8355.84	75	8.42	8.52023	0.813821	1.265	1.589	0.913809	12.5585	16.2868	0.30325	0.788	0.709	25	7.119	30.4782	7.4	0.0712935	78.97	6.031	7.03334	174	0	81.434	5.2	5.35	8797566
Azerbaijan	AZE	4147.09	14121.4	13510	4.69026	2202.39	31	2.65	6.10271		2.426	3.268	0.753869	10.4797	12.4012	0.2515	0.51	0.676	73.2	5.291				62.33	2.081	3.85535	63	0.155374	72.864	8.7	4.69	9854033
Burundi	BDI	292.998	773.572	770	3.21459		22	2.33	5.27448		2.641	3.694	0.422882	3.12437	11.3046	0.3955	0.563	0.755	98.2	2.905	15.5762	3.43333	0.477427	27.43	0.658	0.0472011	45	2.62152	61.247	34.7	3.27	10827024
Belgium	BEL	44288.5	50725.2	51320	5.22506	7709.12	75	7.78	8.31284	0.773361	1.525	1.666	0.918841	11.7839	19.6999	0.272083	0.63	0.739	28.6	6.929	23.7265	6.9	0.0853728	77.38	6.245	8.55051	174	0	81.468	5.8	5.14	11375158
Benin	BEN	1136.59	3044.51	3010	3.47232	100.225	39	5.61	6.61247		2.014	3.297	0.519834	3.774	12.6145	0.44975		0.652	73.6	3.484	13.4224	3.2	0.444113	38.17	1.419	0.595648	61	53.8315	61.47	27.5		11175204
Burkina Faso	BFA	738.274	2053.5	1980			42	4.75	6.64178	0.506559	2.07	3.433	0.433547	1.58557	8.90646	0.3635		0.646	83.9	3.739	17.8862	4	0.432493	42.83	1.204	0.183287	58	46.6654	61.174	30.5		19193284
Bangladesh	BGD	1563.91	4161.09	4340	3.90604	320.204	28	5.43	5.91871	0.409093	2.035	3.564	0.613679	6.06183	11.2045	0.32325	0.579	0.719	87.7	4.643	38.3907	4.7	0.273657	29.56	0.842	0.533299	38	0	72.32	15.3	3.98	159670593
Bulgaria	BGR	8331.06	21363	20850	4.46319	4708.93	43	7.03	7.82606	0.53167	1.631	2.495	0.815711	11.8148	14.8105	0.3875	0.529	0.756	50.6	4.217	20.4408	4.2	0.192834	67.85	3.446	5.8515	156	0	74.928	10.2	4.41	7075947
Bahrain	BHR	23709.4	47642.4	44970	4.53852	19597	36	2.71	6.69071		2.404	2.77	0.83777	9.41183	15.2571			0.632	63.8	6.218				55.15	8.634	22.229	75	0	77.163			1494074
Bahamas, The	BHS	31827.2	35308.4	34260			65		7.40149	0.602051			0.805483	11.533	12.8226			0.743	48.8					54.99	3.739	4.72528	142	0.223196	73.752			381761
Bosnia and Herzegovina	BIH	5394.59	13788.5	13740	3.86873	3446.77	38	4.87	7.2714	0.528924	2.035	2.955	0.769187	9.69292	13.7876	0.3325		0.702	71.3	5.163	25.2855	4.8	0.186045	41.84	3.699	6.45194	105	0	77.262	15.7		3351527
Belarus	BLR	5761.75	18280.2	17580		3679.98	44	3.13		0.512582	2.141	3.048	0.817068	12.3058	15.3589	0.2618		0.744	68.2	5.802	21.7189	5.7	0.13191	64.98	3.987	6.13371	71	0	74.59	8.9		9498264
Belize	BLZ	4887.58	7108.87	6510					6.43271	0.474092			0.72017	9.79584	13.1233			0.692	62.5	5.956	33.8398	6.14286	0.180123	57.79	5.353	1.54285	96	0.784176	74.496	28.3		375769
Bermuda	BMU																									9.48646		0				63873
Bolivia	BOL	3351.12	8423.7	8190	3.6041	742.538	33	5.49		0.382207	2.045	3.325	0.702842	9.01754	14.0131	0.44985	0.742	0.758	72.9	5.822	23.3215	6	0.349805	55.98	3.184	1.95851	77	13.2971	71.239	15.5	3.76	11192854
Brazil	BRA	9925.39	14519.8	14250	4.13515	2619.96	37	6.86	6.319	0.536772	2.199	2.846	0.761153	7.84105	15.3969	0.5168	0.832	0.684	71.8	6.952	34.345	6.9	0.216322	60.7	2.811	2.24239	158	1.12597	75.672	19.7	3.93	207833831
Barbados	BRB	17391.4	15788.8	15080			68		6.83335	0.650005			0.81331	10.5569	15.1557			0.75	48					55.76	3.804	4.46513	146	0.828895	79.081	5.6		286233
Brunei Darussalam	BRN	28572.1	60995.7	64620	4.5152	10291.2	62		6.41992				0.844587	9.1	14.3801			0.671	57.5					63.57	4.222	18.2564	153		75.722			424473
Bhutan	BTN	3286.57	11142.4	10170	4.09954		67	5.08	6.86596		1.474	3.158	0.617299	3.13756	12.128	0.381		0.638	72	5.196	28.6232	5.6	0.265591	47.22	4.492	1.71227	52	0	71.46	17.4		745568
Botswana	BWA	7893.21	17253.2	15980	4.30354	1815.56	61	7.81	7.12115	0.582861	1.622	2.552	0.727787	9.33	12.6972	0.569		0.72	59.5	3.974	16.6051	4.8	0.283913	51.7	2.721	2.93537	78	11.0335	69.275	23.8		2205128
Central African Republic	CAF	450.9	912.802	960			23	1.52	5.15732		3.213	4.154	0.380662	4.282	7.56836	0.499			108.9					36.42	1.218	0.0654578	49		52.805	33.6		4596028
Canada	CAN	45148.6	48633.8	48070	5.34884	15588.5	82	9.15	7.5057	0.809689	1.371	1.614	0.922111	13.3154	16.0914	0.33475	0.735	0.769	20	7.404	23.9418	7.4	0.0882866	72.18	7.74	15.0901	172	0	82.315	5.8	5.06	36543321
Switzerland	CHE	80450	67139	67890	5.85773	7520.17	85	9.03	8.88688		1.373	1.488	0.945936	13.3808	16.2088	0.317833	0.694	0.755	18.7	7.509	34.331	7.8	0.059864	87.42	4.637	4.11749	176	0	83.63	2.7	6.05	8451840
Channel Islands	CHI																											0				168665
Chile	CHL	14999.4	23663.9	22690	4.70863	3879.68	67	7.84	8.00083	0.665533	1.595	2.074	0.846948	10.447	16.5316	0.4745	0.786	0.704	38.9	6.705	31.6655	6.6	0.143068	57.49	4.311	4.71317	161	0	80.042	12.5	4.44	18470439
China	CHN	8879.44	14344.4	14330	5.00197	3927.04	41	3.1	6.00921	0.4998	2.242	3.154	0.757587	7.9	13.8889	0.3855	0.789	0.674	71.1	5.245	25.7264	5.1	0.174994	50.74	3.621	7.17581	60	0.226361	76.704	18.2	4.09	1386395000
Cote d'Ivoire	CIV	2111.03	4830.75	4690	3.93153	274.73	36	3.93	6.37808	0.470543	2.307	3.487	0.515747	5.192	9.62984	0.415		0.611	92.1	3.916	14.4386	3.825	0.446845	45.25	1.182	0.406064	56	25.7372	57.422	23.6		24437469
Cameroon	CMR	1425.11	3554.53	3490	3.65122	275.198	25	3.61	8.53506	0.365729	2.39	3.761	0.562725	6.2917	12.7494	0.461	0.741	0.689	97	4.513	16.6982	4.2	0.472752	40.81	1.378	0.346523	46	6.95171	58.921	30.1	3.32	24566045
Congo, Dem. Rep.	COD	467.074	1059.81	1030	3.26982	108.517	21	1.61	5.13848		3.061	3.93	0.45873	6.75948	9.70259	0.421			110.2	4.272				30.41	0.696	0.0256446	43	12.0527	60.368	33.7		81398764
Congo, Rep.	COG	1767.89	3448.54	3130		202.872	21	3.25	5.73119		2.334	3.62	0.6085	6.50227	11.6021	0.489			92.5	4.236	18.8127	3.9	0.40059	42.39	1.054	0.658897	46	8.74509	64.29	27.4		5110702
Colombia	COL	6377.85	14316.5	14050	4.28835	1312.16	37	6.67	6.65076	0.503506	2.777	3.056	0.760895	8.32658	14.5981	0.5093	0.742	0.731	75.7	6.481	40.695	6.4	0.235044	65.22	2.05	2.03053	112	3.06637	77.109	18.5	4.01	48901066
Comoros	COM	1323.81	3032.25	3050			27	3.71					0.537826	4.90853	11.2389	0.4795			81.7	3.956	23.101	4	0.355964	44.24	1.243	0.253503	52	0.591552	64.118	26.5		813892
Cabo Verde	CPV	3292.65	6643.2	6410			55	7.88	7.2346				0.650693	6.24457	11.8668	0.448		0.686	66.6					56.94	1.433	1.02178	63	20.1689	72.782	25		537497
Costa Rica	CRI	11814.6	19112.4	18160	4.49707	1942.49	59	7.88	7.88874	0.683837	1.701	2.317	0.79352	8.66718	15.3771	0.48465	0.694	0.727	42	7.087	44.7141	7.3	0.145568	67.85	2.682	1.63765	136	0.203555	80.095	16.7	4.32	4949954
Caribbean small states	CSS	9557.52	15238.6	14776.5		3062.99																				8.49081		0.731703		15.4982		7314990
Cuba	CUB	8541.21				1450.88	47	3.31			2.056	3.183	0.777715	11.7508	14.3702			0.745	60.8					63.42	1.777	2.49522	63	0.268791	78.726	8.5		11339259
Curacao	CUW	19457.5	25475.5	25690		4797.67																				33.7615		0.272701				160175
Cayman Islands	CYM	81124.5	69420.5	41640																						8.73249						63382
Cyprus	CYP	26338.7	37766.9	36620	4.29857	3624.97	57	7.59	8.21453		1.94	2.169	0.872955	12.1039	14.674	0.339333		0.684	57.8	5.546	30.7118	6.2	0.120878	72.6	3.748	5.66257	159	0	80.828	5.1		1179680
Czech Republic	CZE	20379.9	38489.5	36120	4.77447	6258.89	57	7.62	8.20922	0.73755	1.36	1.999	0.890755	12.7404	16.8316	0.25475	0.648	0.688	37.6	6.596	27.2841	6.3	0.0939701	67.68	5.589	9.6739	170	0	79.222	5.9	5.09	10594438
Germany	DEU	44349.6	53011.8	54370	5.65484	7035.48	81	8.61	8.4527	0.834912	1.5	1.608	0.938785	14.1321	17.0964	0.305	0.791	0.778	24.7	6.994	29.8155	6.7	0.0839029	78.37	4.841	8.84013	177	0	81.18	4.1	5.27	82657002
Djibouti	DJI	2914.38	4885.22	5100			31	2.76			2.196	3.504	0.495433	4	6.4845	0.423625			85.1		16.4284	4.4	0.416542	40.04	2.399	0.667006	45	17.3179	66.582			944097
Dominica	DMA	7274.72	11304.4	11050			57			0.597504			0.723788	7.8	12.9662									59.38	2.36	2.51985	122		78.119	10.9		71458
Denmark	DNK	57141.1	55064.9	56230	5.39074	5858.8	88	9.22	8.56404	0.891835	1.337	1.361	0.929946	12.5878	19.0661	0.285667	0.809	0.776	19.5	7.526	32.6726	7.5	0.0710609	81.6	6.798	5.54914	175	0	80.784	4	5.81	5764980
Dominican Republic	DOM	7609.34	16735.3	15940	3.86528	1615.52	29	6.66	6.99555	0.465265	2.114	3.012	0.744641	7.93535	14.1408	0.454562		0.697	66.2	5.155	30.3072	4.8	0.296086	64.71	1.719	2.42921	62	2.87463	73.892	34.6	4.19	10513131
Algeria	DZA	4044.28	11550.6	11370	4.0655	1362.87	33	3.56	5.04659		2.201	3.313	0.758978	7.98655	14.7194	0.3145	0.758	0.629	75.4	6.355	33.3005	5.6	0.244862	57.18	2.407	3.69916	47	0.77299	76.693		4.22	41389198
Ecuador	ECU	6213.5	11617.9	11360	3.91432	1376.39	32	6.02	6.68015	0.470338	1.948	3.213	0.757916	8.98551	14.923	0.45455		0.724	71.2	5.976	37.0427	6	0.218879	57.42	1.711	2.49557	88	2.09653	76.8	21.3		16785361
Egypt, Arab Rep.	EGY	2440.51	11014.5	10800	3.90349	1683.21	32	3.36	4.79251	0.361562	2.583	3.332	0.699727	7.326	13.1048	0.31725	0.917	0.608	88.4	4.362	23.781	4.2	0.233553	61.21	1.811	2.52586	48	0	71.825	9.7	2.84	96442593
Eritrea	ERI						20	2.37			2.505	3.925	0.43358	3.9	5.00528				96.4					39.34	0.501		37		65.941	25.3
Spain	ESP	28170.4	39575.5	39570	4.7004	5355.99	57	8.08	8.1422	0.702576	1.568	2.002	0.892788	9.81948	17.877	0.357417	0.657	0.746	40.7	6.361	35.959	6.3	0.101493	78.39	4.041	5.24916	174	0	83.433	4.1	4.4	46593236
Estonia	EST	20388.2	33820.9	33020	4.84988	6732.37	71	7.79	8.48143	0.796399	1.712	1.862	0.881542	13.029	16.0636	0.330083	0.564	0.731	40.8	5.517	17.895	5.4	0.122325	64.31	7.064	12.608	165	0	78.567	6.1	4.74	1317384
Ethiopia	ETH	768.522	2021.56	2010	3.78154	69.1988	35	3.42	5.3885	0.37714	2.477	3.616	0.46985	2.79544	8.71019	0.35525		0.656	94.2	4.508	26.6587	4.6	0.359282	44.78	1.042	0.143525	39	22.3503	66.24	26.7		106400024
Finland	FIN	46316.7	47481.2	47490	5.4894	15250	85	9.03	8.5772	0.869954	1.515	1.361	0.925192	12.4396	19.3164	0.271833	0.767	0.823	16.9	7.413	31.2934	7.4	0.062135	78.64	6.257	8.34722	175	0	81.736	4.7	5.33	5508214
Fiji	FJI	6101.03	13429.3	12610				5.85	7.17804				0.723699	10.884	14.4273	0.366		0.638	71.7					53.09	3.145	2.34547	84	0	67.341	9.6		877459
France	FRA	38812.2	44826.5	45850	5.17951	6939.94	70	7.8	8.03601	0.736784	1.839	1.769	0.891057	11.417	15.4858	0.31525	0.702	0.778	32	6.478	30.4135	6.6	0.0852429	83.95	4.447		175	0	82.541	5.5	5.05	66864379
Faroe Islands	FRO	58622.8																								13.0929						48331
Micronesia, Fed. Sts.	FSM	3289.7	3497.92	3970									0.614158	7.71738	11.5495	0.4535			73					49.8		1.29758	107		67.755	1.9		111459
Gabon	GAB	7230.4	15006.8	14060	3.83169	1167.85	32	3.61	5.51783		2.052	3.201	0.701625	8.32007	12.9	0.401			70.5	4.121	17.4968	4	0.362162	45.05	2.292	2.64998	52	2.95306	66.187	23.2		2064823
United Kingdom	GBR	40361.4	45974.9	45430	5.50682	5130.39	82	8.53	8.54991	0.807684	1.786	1.624	0.920352	12.9507	17.4429	0.334667	0.735	0.77	36.7	6.725	31.9093	6.9	0.0929739	79.89	4.368	5.7768	175	0	81.236	3.1	4.89	66058859
Georgia	GEO	4357	13589.7	12920	4.27886	2693.97	56	5.93	7.87384	0.609636	2.084	2.807	0.786359	12.8146	15.4331	0.3761	0.668	0.679	72	4.252	31.076	4.3	0.19678	55.69	2.122	2.71717	99	0	73.6	15.3	3.99	3728004
Ghana	GHA	2025.93	4996.64	4860	3.7227	351.302	40	6.69	7.10219	0.591564	1.793	2.856	0.59567	7.184	11.5192	0.42925	0.661	0.695	65.9	4.276	21.4347	5.1	0.375645	49.66	1.969	0.585289	62	18.0563	63.78	24.9	3.34	29121471
Gibraltar	GIB					5693.11																				18.804		0				33728
Guinea	GIN	856.565	2420.6	2410	3.47457		27	3.14	5.603		2.089	3.851	0.465515	2.70739	9.00675	0.3655		0.659	99.4	3.607	15.8536	3.7	0.418959	46.62	1.559	0.255225	54	14.3509	61.185	28.2		12067539
Gambia, The	GMB	676.656	2072.65	2030	3.60521		30	4.06	6.35105		2.211	3.357	0.465725	3.666	9.4821	0.39475		0.649	83.9					42.42	1.003	0.247408	68	1.07686	61.735	29.7		2213894
Guinea-Bissau	GNB	736.726	1925.24	1930			17	1.98	6.28161		2.309	3.649	0.461406	3.3035	10.5	0.507			95.5					44.67	1.483	0.164584	51	16.8671	58.003	31.1		1828146
Equatorial Guinea	GNQ	9667.91	22551.1	16600			17	1.81			1.93	3.84	0.588422	5.55089	9.2				82.6					60.4	1.876	4.65324	47	2.85407	58.402	24.6		1262001
Greece	GRC	18930.2	29089	29150	4.02173	5062.61	48	7.29	7.2114	0.602126	1.998	2.214	0.871952	10.5396	17.3367	0.357667	0.677	0.692	53.9	5.033	23.621	5.1	0.158711	73.6	4.268	5.79385	171	0	82.072	9.2	3.7	10754679
Grenada	GRD	10152.8	16217.5	14710			52			0.610447			0.763383	8.8	16.6045				57.6					50.93	2.935	2.42779	127	3.5411	72.384	9.3		110874
Greenland	GRL	50321.4																								9.07189		0				56172
Guatemala	GTM	4451.45	8317.36	8140	4.08476	601.19	28	5.86	7.10628	0.439127	2.245	3.212	0.651035	6.46789	10.6215	0.49475		0.667	81.4	6.324	34.2364	5.9	0.274812	52.33	1.879	1.05995	123	4.68712	74.063	16.6	3.7	16087418
Guam	GUM	35615.8																														164281
Guyana	GUY	4586.05	8989.04	8780	3.55645		38	6.46	6.527	0.502425	2.021	3.033	0.670296	8.46677	11.4726	0.446			68.2					47.93	3.386	3.09004	84	0.612205	69.774	24.6		775221
Hong Kong SAR, China	HKG	46165.9	59849.2	62450	5.5323	6083.27	77	6.31	8.88125	0.768109			0.938809	12.0381	16.5122	0.539				5.458	16.7997	5.5	0.0995368			5.94889		0	84.687			7391700
Honduras	HND	2453.73	5562	5220	3.91732	619.836	29	5.72	6.7879	0.402629	2.185	3.25	0.622981	6.59644	10.2079	0.49955		0.711	77.8	4.871	27.1588	4.6	0.311081	51.51	1.552	1.05847	123	6.009	75.088	16.7	3.61	9429013
Croatia	HRV	13412.3	26595.7	26200	4.19062	3714.38	49	6.63	7.75157	0.611026	1.665	2.268	0.837313	11.4052	14.9625	0.309333	0.498	0.711	47.5	5.488	30.1642	6	0.117672	65.45	3.937	4.18938	156		78.342	8.1	4.48	4124531
Haiti	HTI	765.727	1763.66	1770	3.21606	39.0558	22	4.03	6.83275		2.026	3.595	0.502731	5.44169	9.5	0.5095			99.3	4.028	28.5672	4.4	0.369861	33.74	0.675	0.274687	53	19.8776	63.66			10982366
Hungary	HUN	14457.6	29529.3	28340	4.32659	3965.96	45	6.64	7.74301	0.545824	1.494	2.175	0.8447	11.8894	15.1171	0.300333	0.453	0.67	49.6	5.145	26.3832	4.7	0.151546	65.01	3.612	4.63997	168	0	76.701	7.8	4.74	9787966
Indonesia	IDN	3837.65	10935.8	10590	4.68151	811.907	37	6.39	6.8348	0.516879	1.85	3.244	0.706858	7.97615	12.9156	0.3861	0.837	0.691	70.4	5.314	35.7161	5.4	0.206822	46.92	1.69	2.15376	63	9.67557	71.509	12.2	3.95	264645886
Isle of Man	IMN	80989.2																														83598
India	IND	1981.65	6185.99	6120	4.58671	804.514	40	7.23	6.54609	0.517754	2.541	3.31	0.646901	6.45213	12.3498	0.3515	0.83	0.669	74.4	4.404	29.1755	4.6	0.313137	30.57	1.169	1.81778	49	25.7311	69.416	22.6	3.09	1338658835
Ireland	IRL	69822.3	78128.2	62040	5.15847	5672.06	74	9.15	8.68062		1.408	1.448	0.942473	12.5263	18.7933	0.321	0.813	0.794	20.6	6.907	30.0165	7	0.0849393	78.77	5.127	7.93034	173	0	82.103	4.1	5.44	4807388
Iran, Islamic Rep.	IRN	5520.31	14535.9	14560	4.27007	3022.12	30	2.45	4.82902	0.475477	2.364	3.611	0.797483	10.0115	14.7268	0.407562	0.673	0.583	83	4.813	23.992	4.6	0.230906	58.16	3.191	8.3167	38		76.479	20.5	4.08	80673951
Iraq	IRQ	5205.29	10972	10890		1328.23	18	4.09			3.556	3.916	0.688784	7.316	11.1487	0.295			99.1	4.575	26.5213	4.7	0.270117	43.2	1.745	5.1914	27	0.0199193	70.454	20.7		37552781
Iceland	ISL	71310.9	55562.4	54380	4.99307	53832.5	77	9.58	8.11831		1.111	1.5	0.938474	12.5367	19.1745	0.2675	0.467	0.878	19.8	7.501	31.0787	7.6	0.0508636	78.57		6.15468	170	0	82.855	6.6	6.07	343400
Israel	ISR	40541.9	38966.7	38570	5.31234	6600.9	62	7.79	7.68021		2.707	2.283	0.906235	12.9592	15.9912	0.406375	0.742	0.721	76.5	7.267	28.8315	7.1	0.0762164	75.01	4.876	7.62535	150	0	82.819	4.2	4.51	8713300
Italy	ITA	32406.7	41784.6	42010	4.54212	5002.41	50	7.98	8.01986	0.648293	1.737	2.095	0.882584	10.2451	16.2469	0.34375	0.66	0.692	43.8	5.977	28.0765	5.8	0.116599	76.96	4.436		175	0	83.352	5.6	4.31	60536709
Jamaica	JAM	5069.18	9598.37	9320	4.24696	1050.73	44	7.29	7.22396	0.576292	2.072	2.608	0.725679	9.79691	13.1407	0.35		0.717	61.2	5.51	36.8884	5.55	0.211465	58.58	1.612	2.83015	79	0.524905	74.368	13.6		2920853
Jordan	JOR	4162.82	9841.17	9790	4.29748	1864.68	48	3.87	6.84166	0.596676	2.087	3.026	0.723445	10.452	11.8767	0.367	0.761	0.604	75.9	5.303				62.2	2.08	2.6287	45	0.192675	74.405	24.4	3.4	9779173
Japan	JPN	38386.5	40858.9	42320	5.49494	7819.71	73	7.88	8.19886	0.785817	1.408	1.824	0.914696	12.8	15.2306	0.343	0.609	0.657	34.3	5.921	28.3193	6	0.0928469	74.69	4.493	8.94437	175	0	84.47	4.1	4.53	126785797
Kazakhstan	KAZ	9247.58	24863	22160	4.34987	5600.21	31	3.06	6.83654	0.513898	1.992	3.096	0.817244	11.784	15.2652	0.26955	0.926	0.713	61.6	5.919	19.0504	5.8	0.178588	54.56	5.546	13.8927	71	0	73.236	17.6	4.26	18037776
Kenya	KEN	1572.34	4046.21	3970	3.97676	164.326	28	5.11	6.67516	0.44714	2.336	3.519	0.578588	6.564	11.0642	0.4465	0.772	0.694	93.5	4.356	24.2164	4.5	0.378988	47.25	1.017	0.365117	69	10.3449	66.342	27.8		50221473
Kyrgyz Republic	KGZ	1242.77	5046.69	4800	3.89641	1941.22	29	5.11	6.55201	0.473623	2.216	3.28	0.674203	10.8804	13.361	0.2891	0.629	0.691	76.2	5.185	33.078	5.2	0.181532	54.86	1.655	1.60987	59	0	71.321	15.4	3.36	6198200
Cambodia	KHM	1385.26	3928.37	3680	3.93165	271.367	21	3.63	5.43554	0.32166	2.065	3.486	0.581485	4.844	11.3368	0.379	0.7	0.676	82.5	3.907	25.6494	3.9	0.27535	43.23	1.391	0.629142	49	31.7492	69.57	17.8		16009414
Kiribati	KIR	1640.5	2240.54	4290									0.623244	7.86553	11.81	0.37								55.26		0.586595	111	28.4488	68.116	4.4		114158
St. Kitts and Nevis	KNA	19155.3	25355.5	24090						0.660308			0.776815	8.5	13.608										2.332	4.61705	139		74.564			52045
Korea, Rep.	KOR	31616.8	41001.1	41170	5.07242	10496.5	54	8	8.16538	0.720278	1.823	2.131	0.905832	12.185	16.3938	0.357	0.7	0.65	33.7	5.835	24.7904	6	0.110594	62.3	6	12.1111	173	0	82.846	9.8	5.09	51361911
Kuwait	KWT	29759.4	50855.5	59260	4.42859	15590.6	39	3.85	6.15814		1.909	2.698	0.808352	7.27567	13.7588			0.628	53.2	6.239				62.28	8.585	24.9525	83	0	75.398	17.6		4056099
Lao PDR	LAO	2423.85	7257.81	6870	3.9136		29	2.37	6.47891		1.8	3.592	0.604069	5.202	11.0572	0.3655	0.849	0.703	78.7	4.876				42.94	1.906	2.5947	47	20.6841	67.61	16.6	3.22	6953035
Lebanon	LBN	7801.18	16005.3	15940	3.8448	2588.3	28	4.72	6.45775	0.469074	2.782	3.371	0.730078	8.7	11.2859	0.318		0.596	85	5.129	21.8978	4.6	0.189068	61.08	3.287	3.6948	38	0	78.875	18.1		6811873
Liberia	LBR	698.702	1515.64	1380	3.08002		31	5.23	6.58387	0.452967	2.023	3.499	0.46472	4.668	9.57967	0.336875		0.669	90.2	3.622	22.1823	4.4	0.383681	41.62	1.107	0.3022	47	39.6122	63.73	35.9		4702228
Libya	LBY	5756.7	13238	13690		1811.06	17	2.32	4.37108		3.328	3.463	0.707568	7.56	12.7899				92.2	5.615				49.79	3.733	7.78851	36	0	72.724	26.1		6580724
St. Lucia	LCA	11047.4	14945.8	14140			55			0.627803			0.744931	8.49149	13.8728	0.512								56.18		2.30175	130	0.797061	76.057	35.4		180955
Liechtenstein	LIE	173356											0.916724	12.5485	14.7209											1.36327	167	0	80.537			37800
Sri Lanka	LKA	4077.04	12584.1	12250	4.08444	531.091	38	6.48	5.91164	0.523817	2.019	3.237	0.780115	11.0518	13.9653	0.3965	0.665	0.669	84	4.415	33.7918	4.2	0.169406	60.61	1.495	1.10185	41	0.559472	76.812	14.9	3.79	21444000
Lesotho	LSO	1150.08	2783.12	3150	3.19511		42	6.64	6.63061		2.066	3.228	0.517955	6.348	10.7378	0.541	0.798	0.695	79.7		16.6651	4.9	0.421758	33.78	1.379	1.21055	69	27.28	53.705	28.9	2.63	2091412
Lithuania	LTU	16882.6	33821.2	32560	4.58422	3821.15	59	7.41	8.33612		1.732	2.079	0.869308	12.961	16.4995	0.3735	0.516	0.742	38.1	5.813	21.0366	5.8	0.112708	69.33	5.567	4.51946	166	0	75.737	8	4.86	2828403
Luxembourg	LUX	107627	112823	72750	5.23206	13914.7	82	8.81	8.47965				0.90872	12.1958	14.2275	0.322083	0.681	0.706	20.4	6.871	13.1512	7	0.0678374	79.12	12.911	15.4426	174	0	82.102	6.3	6.07	596336
Latvia	LVA	15586.6	28488.9	28360	4.39772	3507.4	58	7.25	8.23317		1.67	2.305	0.853902	12.8254	15.9827	0.348083	0.536	0.756	43.9	5.56	17.0567	5.1	0.141063	66.12	6.357	3.5743	166	0	75.172	9.3	4.67	1942248
Macao SAR, China	MAC	81516.7	126918	116080																					1.7	3.37478						622585
St. Martin (French part)	MAF																															36560
Morocco	MAR	3036.33	7314.15	7170	4.24411	904.442	40	4.87	6.23447	0.508562	2.004	2.97	0.676439	5.514	13.0676	0.4015	0.814	0.598	73	5.151	32.6588	5	0.245999	63.47		1.74444	61	7.26023	76.453	19.6		35581294
Monaco	MCO	167517																										0				38392
Moldova	MDA	3509.69	11651.3	12320	3.99234	1725.62	31	5.94	6.77769	0.489945	1.938	3.081	0.711452	11.5628	11.6139	0.26425	0.479	0.74	67.1	5.897				51.97		1.82554	110	0.134034	71.808	9.7	4	2755158
Madagascar	MDG	515.293	1584.42	1540	3.40461		24	5.11	6.78919	0.436129	1.797	3.535	0.520697	6.1	10.4132	0.418	0.671	0.692	80.9	3.695				33.73	0.929	0.156877	52	44.5757	66.681	28.6	3.03	25570540
Maldives	MDV	9540.63	17988.7	16560			33						0.718707	6.818	12.118	0.360333		0.669	69.8					52.14		3.0384	83	0	78.627	0.9		496402
Mexico	MEX	9278.42	19795.9	19300	4.43537	2157.32	29	6.41	6.93315	0.454688	2.646	2.858	0.767447	8.60085	14.2974	0.46375	0.732	0.692	69.7	6.778	40.6973	7.3	0.187699	59.69	2.603	3.94383	144	0.885026	74.992	13.1	4.12	124777324
Marshall Islands	MHL	3666.7	3780.94	4860									0.697589	10.8857	12.3901											2.47706		10.0552	73.861			58058
North Macedonia	MKD	5430.87	15528.9	14910	4.28105	3496.53	35	5.57	7.20792	0.528408	2.133	2.734	0.759422	9.68012	13.464	0.345	0.564	0.702	64.6	5.121	23.3919	4.6	0.180864	61.06	2.924	3.389	112	0.684482	75.688	6.4	4.1	2081996
Mali	MLI	830.557	2248.26	2180	3.33049		31	5.64	5.89118		2.596	3.424	0.427206	2.35295	7.60336	0.3655	0.645	0.583	94.5	4.073				43.71	1.574	0.176967	54	7.19539	58.893	23.1	3.1	18512394
Malta	MLT	27239.1	41554.9	37830	4.64811	4924.54	56	8.15	8.32658				0.885266	11.2881	15.8966	0.288417		0.682	34.5	6.488	28.9631	6	0.126316	80.9	5.793	2.94741	169	0	82.376	6.1		467999
Myanmar	MMR	1291.54	4739.91	4600	3.31542	215.299	30	3.83	5.46732	0.420932	2.179	3.528	0.584252	4.9534	10.3154	0.356333		0.691	94.3	4.395	24.7361	4.4	0.322738	45.32	1.66	0.47658	42	9.4218	66.867	19.9		53382581
Montenegro	MNE	7803.41	19627.1	20030	4.14518	4612.34	46	5.69	7.43864		1.95	2.558	0.815934	11.3868	15.0319	0.337375		0.693	55.3	5.161	25.1256	5.2	0.155863	61.33	3.651	3.24095	110	0.052536	76.77	10.7		622373
Mongolia	MNG	3669.42	11311.8	9720	3.89878	2006.39	36	6.5	7.50227	0.543852	1.801	3.04	0.734684	10.172	14.2066	0.327875	0.57	0.713	54.1	4.907	14.2695	4.9	0.219086	57.51	7.672	8.30017	55	10.3175	69.689	16.5	3.74	3113779
Northern Mariana Islands	MNP	28305.2																										0.165415				56562
Mozambique	MOZ	461.415	1283.66	1250	2.88645	478.921	25	4.02	6.23434		2.013	3.494	0.446045	3.5409	9.74711	0.519	0.711	0.741	88.7		23.7063	5	0.426987	46.37	0.814	0.285402	57	27.406	60.163	30.1	2.47	28649007
Mauritania	MRT	1578.11	5077.2	5000	3.08916		28	3.82	5.65571		2.355	3.767	0.527057	4.614	8.46557	0.337	0.623	0.614	90.1	4.201	17.9981	4.7	0.367299	39.24	2.316	0.657914	57	31.9315	64.704	24.7	3	4282574
Mauritius	MUS	10484.9	21415.1	23540	4.52329	2182.51	50	8.22	7.88297		1.547	2.229	0.796406	9.43	14.9698	0.361667		0.664	38.9	5.648	27.384	5.53333	0.165262	56.63	3.522	3.44215	134	0.130682	74.863	13.7		1264613
Malawi	MWI	356.718	1037.55	1010	3.11411		31	5.49	6.65754	0.510766	1.825	3.413	0.4854	4.63	10.9528	0.4525	0.737	0.672	83.3	4.156	22.1308	4.3	0.445381	49.21	0.739	0.0754488	69	5.71351	63.798	31	2.81	17670260
Malaysia	MYS	10254.2	26648.3	25900	5.17444	4651.96	47	6.54	6.60564	0.535365	1.637	2.647	0.804186	10.16	13.4688	0.436625	0.82	0.67	60.5	6.005	30.2917	5.9	0.101843	59.22	3.918	8.09159	166		75.997	23.6	4.3	31105028
Namibia	NAM	5303.31	10050.5	9870	3.99075	1652.57	51	6.31	7.01958		1.838	2.757	0.645037	6.94	12.6334	0.59725	0.91	0.777	66.4	4.574	21.5692	4.68571	0.262979	58.46		1.79304	75	48.7126	63.373	30.4	3.25	2402603
New Caledonia	NCL																									19.2665		0				280350
Niger	NER	516.888	1161.66	1140		51.195	33	3.76	5.73497		2.343	3.718	0.376591	2.02905	6.47145	0.34225			96.2	3.856	16.8466	3.8	0.397602	35.74	1.661	0.097016	54	67.8491	62.024	26.2		21602472
Nigeria	NGA	1968.56	5190.35	5030	3.29974	144.525	27	4.44	5.91598	0.436755	2.849	3.865	0.534136	6.4619	9.74641	0.459	0.695	0.641	98.5	4.875	22.2468	5.5	0.442311	54.76	1.088	0.647285	46	19.8043	54.332	21.4	3.08	190873311
Nicaragua	NIC	2159.16	6004.03	5850	3.94974	568.314	26	4.66	6.71869	0.43433	2.002	3.237	0.651104	6.796	12.2069	0.46425	0.719	0.814	78.1	5.992	38.6883	5.4	0.247174	55.04	1.759	0.887087	114	6.50299	74.275		4.05	6384855
Netherlands	NLD	48675.2	55347.9	55770	5.66201	6712.77	82	8.89	8.55333	0.854106	1.525	1.535	0.933495	12.19	18.0448	0.291	0.73	0.737	24.8	7.339	35.3155	7.5	0.0432207	75.46	4.826	10.028	174	0	82.143	3.8	5.61	17131296
Norway	NOR	75496.8	62940.6	65730	5.40379	22999.9	85	9.87	8.56952	0.887712	1.486	1.408	0.953688	12.5668	18.0608	0.2705	0.805	0.83	18	7.498	36.8271	7.7	0.0685538	77.49	5.511	7.83696	175	0	82.271	2.7	6.08	5276968
Nepal	NPL	911.444	3099.31	3140	4.01781	146.468	31	5.18	6.89635	0.525387	2.08	3.444	0.579485	4.856	12.1952	0.328	0.673	0.664	84.7	4.793	30.5128	4.2	0.271445	31.44	1.071	0.333998	36	21.4905	70.478	15.9	4.15	27627124
Nauru	NRU	8510.87	10682.2	14950											11.2594											3.65323		2.58889				12876
New Zealand	NZL	42849.4	41493	39330	5.3689	9026.32	89	9.26	8.86426	0.826755	1.241	1.533	0.920886	12.6782	18.8376	0.362	0.723	0.791	20.1	7.334	31.2583	7.2	0.0807859	75.96	4.742	7.32587	171	0	82.145	7.8	5.25	4793900
Oman	OMN	15130.9	29083.2	27890	4.31036	6445.57	44	3.04	6.1091		1.983	2.701	0.833789	9.73185	14.6641				50		21.1394	6.9	0.134065	51.32	6.764	14.1671	71	0	77.633	16.1		4665935
Pakistan	PAK	1464.99	4571.41	4820	3.66857	447.501	32	4.26	5.57026	0.391779	3.058	3.818	0.560446	5.15894	8.46498	0.3175	0.526	0.546	94.2	5.132	31.5001	5.1	0.39646	37.5	0.834	0.987832	30	10.4294	67.114	14.3	3.55	207896686
Panama	PAN	15150.3	30454.8	28610	4.43708	2064.18	37	7.08	7.65207	0.52009	1.835	2.722	0.795055	10.17	12.8806	0.5023	0.763	0.722	47	6.701	39.5026	6.9	0.189979	62.71	2.252	2.65414	129	4.42021	78.329	14.3	4.54	4106771
Peru	PER	6710.51	12506.5	11930	4.22321	1345.88	37	6.49	7.43776	0.522105	1.986	2.98	0.759104	9.2154	13.8474	0.43845	0.778	0.719	68.2	5.743	34.5555	5.8	0.212019	61.92	2.238	1.8565	120	6.52947	76.516	13.5	4.29	31444297
Philippines	PHL	3123.23	8120.84	9020	4.35091	696.347	34	6.71	6.96552	0.468831	2.555	3.236	0.71186	9.39309	12.7225	0.43325	0.839	0.79	83.1	5.279	34.9911	5	0.263116	57.65	1.33	1.17965	63	5.08606	71.095	12.3	3.83	105173264
Palau	PLW	16078.3	17865.8	18770									0.814246	12.4	15.5532											12.6199	108	0	73.678			17808
Papua New Guinea	PNG	2695.25	4353.27	4270			29	6.03	6.76458		2.095	3.242	0.543076	4.62	9.99646	0.464			83.1					39.35	1.747	0.911013	79	14.4689	64.263	14.2		8438029
Poland	POL	13861.3	30152.7	28930	4.59443	3971.8	60	6.67	8.07619	0.670688	1.676	2.032	0.871768	12.294	16.4332	0.312167	0.717	0.728	42.8	5.835	27.4712	5.9	0.111455	64.11	4.428	7.87558	163	0	78.544	9.7	4.61	37974826
Puerto Rico	PRI	31108.8	34363.7	22940																								0				3325286
Korea, Dem. People’s Rep.	PRK					601.69	17	1.08			2.967	3.686			10.8406											1.11759		0	72.095			25429985
Portugal	PRT	21490.4	33086.1	32310	4.56749	4662.6	63	7.84	8.3105	0.717709	1.258	1.889	0.850212	9.19096	16.2965	0.347417	0.709	0.734	25.3	5.123	24.8474	4.99	0.163386	71.91	4.1	4.72055	173	0	81.857	7.4	3.97	10300300
Paraguay	PRY	5680.58	12594.3	12200	3.7106	1552.38	29	6.31	6.95105		1.961	3.28	0.724348	8.45044	12.6899	0.48595	0.752	0.678	67	5.538	23.3262	5.8	0.223908	53.93	2.903	1.09287	130	0.661792	74.131	22.7	4.19	6867062
West Bank and Gaza	PSE	3254.49	5754.78	6550				4.46			2.774		0.690017	9.10464	12.843	0.34075				4.754	34.4719	4.6	0.237579			0.740607	37	0.163598	73.895			4454805
Pacific island small states	PSS	4132.19	7200.63	7038.83																						1.41103		16.5631		12.3136		2422086
French Polynesia	PYF																									2.80459						276103
Qatar	QAT	61264.4	95058.5	94820	5.10565	14781.6	63	3.19	6.42538		1.664	2.375	0.848441	9.66734	12.1789			0.626	45.4	6.375				67.8	14.411	38.9015	77	0	80.1	9.3		2724724
Romania	ROU	10807.8	27191.7	26810	4.27656	2584.41	48	6.44	8.19178	0.654388	1.6	2.678	0.81557	10.9784	14.2635	0.319667	0.623	0.708	47.8	5.528	28.8015	5.2	0.194375	64.78	3.094	3.51526	156	0	75.924	10.3	4.43	19587290
Russian Federation	RUS	10720.3	26006	25310	4.64193	6602.66	29	3.17	6.11336	0.467675	3.047	3.235	0.824038	12.02	15.5357	0.38975	0.826	0.696	74.7	5.856	18.7102	5.6	0.159164	63.79	5.16	11.9994	113	0	72.386	18	4.2	144496740
Rwanda	RWA	772.318	1975.25	1910	4.34883		55	3.19	7.10226		2.227	3.222	0.536015	4.41715	11.1666	0.47225	0.73	0.822	87.5	3.515	19.6284	3.3	0.372089	43.68	0.763	0.0955339	52	2.19012	68.7	29.7	3.24	11980937
Saudi Arabia	SAU	20803.7	47309.1	48040	4.82714	9401.37	49	1.93	5.37092		2.474	2.919	0.856963	9.67145	16.9791	0.459		0.584	70.4	6.379				57.47	6.234	17.3676	69	0	74.998	28.8		33099147
Sudan	SDN	1111.87	4362.58	4200		190.221	16	2.15			3.213	3.785	0.507499	3.72	7.73987	0.348			108	4.139				51.49	1.22		40	24.3126	65.095	25.7		40813396
Senegal	SEN	1361.7	3203.9	3110	3.80903	229.352	45	6.15	6.45974	0.549668	1.929	3.275	0.51377	3.06893	8.97107	0.403	0.698	0.684	77.2	4.219	21.896	3.7	0.328185	49.52	1.142	0.727113	56	13.7544	67.665	23.4	3.09	15419381
Singapore	SGP	60913.7	94941	87740	5.70571	8844.69	84	6.32	8.33642	0.795903	1.534	1.829	0.934819	11.4965	16.3282	0.459	0.733	0.702	28.1	6.739				64.23	5.879	6.69405	176	0	83.458	2.8		5612253
Solomon Islands	SLB	2059.05	2337.64	2230			39						0.557341	5.54073	10.2204	0.371			81.9					43.22	2.426	0.272315	117	53.6898	72.835	17.4		636038
Sierra Leone	SLE	499.381	1642.61	1590	3.19796		30	4.66	6.47468	0.454001	1.76	3.491	0.438465	3.6	10.1759	0.345667	0.587		86.8	4.635	15.2646	4.5	0.498696	42.54	1.19	0.149105	62	17.6223	54.309		3.02	7488431
El Salvador	SLV	3910.26	8454.06	7980	3.76846	937.074	33	6.43	7.08907	0.479831	2.239	2.905	0.666681	6.94276	12.0356	0.3883	0.657	0.705	69.8	6.068	35.6352	5.9	0.223003	53.91	2.057	1.12788	121	1.00567	73.096	22.2	3.96	6388122
San Marino	SMR	45394.2	58860.8												15.1112													0		0		33671
Somalia	SOM						9				3.387	4.192							112.3	5.44					0.969	0.0454962	32	27.5272	57.068	27.1		14589119
Serbia	SRB	6284.19	16534.3	15450	4.1411	4271.74	41	6.41	7.30135	0.499444	1.888	2.783	0.79926	11.1807	14.7661	0.357333	0.542	0.727	68	5.177	29.0483	5.2	0.190906	57.49	2.992	6.40683	119	0.0771015	75.849	7.4	3.7	7020858
South Sudan	SSD					43.5817	12				3.524	3.82	0.41277	4.84913	5.00038	0.4615			112.2	3.832					1.451	0.159442	39	62.8159	57.604	29.9	0	10910759
Sao Tome and Principe	STP	1811.01	3915.73	3900			46						0.608556	6.43676	12.6872	0.308			71.1					54.01	1.723	0.595447	58	47.4338	70.17	27.5		207089
Suriname	SUR	5626.8	16341.4	14340		3596.78	41	6.76	7.29066	0.507719			0.723693	9.12537	12.8588			0.689	61.9	6.269	25.4472	6.3	0.189258	54.2	2.965	3.077	75	2.8108	71.57	14.5		570496
Slovak Republic	SVK	17554.3	30907.4	30270	4.33362	5137.07	50	7.16	8.03547		1.611	2.171	0.856878	12.6056	14.5331	0.25575	0.463	0.694	40.5	6.078	28.2289	5.9	0.128155	70.6	4.206	5.97032	167	0	77.388	6.1	4.9	5439232
Slovenia	SVN	23500.8	36650.8	35990	4.4773	6728	61	7.5	8.01128	0.670572	1.364	1.921	0.901601	12.2734	17.4222	0.249417	0.551	0.805	28	5.768	24.6388	6.1	0.102228	67.57	5.125	6.11746	167	0	81.172	6.4	4.93	2066388
Sweden	SWE	53791.5	52739	53590	5.51892	13480.1	84	9.39	8.48453	0.863368	1.516	1.396	0.936628	12.426	18.8322	0.27925	0.834	0.816	20.3	7.291	28.0349	7.6	0.0567073	80.51	6.457	4.35875	175	0	82.654	2.8	5.76	10057698
Eswatini	SWZ	3953.09	8493.9	8000	3.35443		39	3.03	6.65905		2.01	3.255	0.608082	6.74781	11.3788	0.521667		0.67	85.3		15.536	4.9	0.410458	40.32	1.858	1.03691	70	7.0374	59.401	26.9		1124753
Sint Maarten (Dutch part)	SXM		32256.3	31340																								0.13138				40574
Seychelles	SYC	15906.1	27242.7	25220	3.79603		60		7.71494				0.801395	9.67281	15.4525	0.468			55.2					66.02		6.39073	141	0	73.333	15.9		95843
Syrian Arab Republic	SYR					974.317	14	1.43	4.04097		3.814	3.757	0.548903	5.1	8.8501			0.568	111.5	3.069	19.1004	3.2	0.303825		1.382	1.65177	28		71.779	26.5		17068002
Taiwan	TAI				5.32655		63	7.73	8.34164		1.782	2.431				0.338				6.379				72.84			134
Turks and Caicos Islands	TCA	25933.6	25477.4	25040																						5.91791		1.60455				37115
Chad	TCD	665.948	1587.03	1570	2.98876		20	1.5	5.37912		2.495	3.961	0.401176	2.4095	7.46536	0.433	0.693	0.575	108.5	3.763	12.7772	4	0.507342	45.34	1.515	0.0697557	52	66.9893	53.977	27.6	2.97	15016773
Togo	TGO	626.092	1516.53	1520		154.665	32	3.05	6.07194		1.939	3.517	0.512733	4.94993	12.5683	0.43825			87.4	3.303	13.2333	2.86667	0.428742	41.78	1.056	0.399417	56	47.6904	60.76	29.2		7698475
Thailand	THA	6592.91	17420.6	16640	4.72349	2538.8	37	4.63	6.52169	0.504548	2.286	2.987	0.764605	7.7314	14.6503	0.38335	0.851	0.694	73.1	6.474	37.2901	6.3	0.150003	49.88	2.488	4.11422	73	0	76.931	32.7	4.24	69209858
Tajikistan	TJK	806.042	3089.53	3610	4.13556	1499.49	21	1.93	6.3654		2.263	3.462	0.656039	10.6717	11.4079	0.346	0.535	0.678	77.7	4.996	34.2496	4.5	0.258963	47.85	0.947	0.612889	54	0.0659229	70.879	18.1	3.3	8880268
Turkmenistan	TKM	6587.09	14205	13620		2678.76	19	1.72			2.27	3.578	0.710131	9.78	10.8893	0.408			71.4	5.658	14.6085	5.5	0.311074	66.1	5.319	12.4736	50	0	68.073	14.5	0	5757669
Timor-Leste	TLS	1294.72	3165.8	4490			38	7.19	5.95595		1.866	3.139	0.625887	4.53788	12.3982	0.295		0.628	85.5					49.54	0.496	0.406012	85	19.515	69.26	12.7		1243261
Tonga	TON	4217.48	6321.61	6420									0.71743	11.21	14.3	0.375667								62.49	3.396	1.26907	113	0	70.801	16.8		101998
Trinidad and Tobago	TTO	16238.2	26447.6	26500	4.08962	7092.93	41	7.04	6.76997	0.557095	2.095	2.682	0.799028	11.0259	12.96				53	6.168	15.7183	6.4	0.21384	67.36	8.378	31.8449	133	0.0741614	73.38	12.1		1384072
Tunisia	TUN	3481.23	10605.3	10270	3.93006	1454.64	42	6.32	6.43526	0.533769	1.977	2.82	0.739201	7.17226	15.1015	0.3535	0.691	0.651	70.1	5.045	26.1971	4.5	0.220079	62.35	2.195	2.6484	66	0	76.505	22.8	3.82	11433443
Turkey	TUR	10513.6	27934.2	27570	4.41812	2847.13	40	4.88	6.76699	0.416654	2.777	3.036	0.80649	7.66791	16.4391	0.413875	0.818	0.625	80.3	5.389	26.4246	5.3	0.186394	52.96	3.358	4.66947	107	0.316782	77.437	12.3	4.26	81101892
Tuvalu	TUV	3572.49	3903.66	5580											12.3089	0.391										0.980045		7.03843				11370
Tanzania	TZA	1004.84	2530.44	2470	3.71056	103.683	36	5.47	6.59445	0.469083	1.876	3.414	0.528303	6.008	8.00989	0.386333	0.552	0.7	80.1	3.666	22.1384	4	0.332875	50.83	1.222	0.225685	68	11.7487	65.015	29.2	3.43	54663906
Uganda	UGA	747.197	2074.86	2030	3.69811		26	5.09	6.63757	0.402015	2.182	3.48	0.528191	6.09025	11.2426	0.41525	0.686	0.721	95.3	3.739	19.4191	4.3	0.413862	44.28	1.063	0.143267	64	5.62367	62.973	29	3.21	41162465
Ukraine	UKR	2640.68	11871.1	12140	4.10663	3418.57	30	5.69	5.95416	0.497254	3.184	3.097	0.749746	11.34	15.0738	0.253437	0.901	0.705	71	4.324	26.3832	5	0.167264	52.87	2.909	4.49397	114	0.00118285	71.953	13.7	3.42	44831135
Uruguay	URY	17322.1	21324.8	20060	4.14622	3085.19	70	8.12	7.79419	0.709919	1.709	2.109	0.807764	8.72872	16.3448	0.4025	0.639	0.71	34	6.545	36.1343	6.4	0.1767	64.65	1.92	1.97586	139	0.398601	77.77	13.4	4.46	3436646
United States	USA	59957.7	59957.7	61020	5.85255	12997.4	75	7.98	8.38521	0.730867	2.232	1.853	0.919926	13.4134	16.2744	0.422875	0.859	0.718	38	7.104	20.7464	7	0.129564	71.19	8.104	15.5022	174	0	78.851	12.4	4.6	324985539
Uzbekistan	UZB	1826.57	6518.8	6650		1645.44	22	1.95		0.459363	2.132	3.571	0.710478	11.525	12.0121	0.368			75.7	5.987	29.1263	6	0.298202	45.88	1.923	2.88279	54	0	71.573	11.5		32388600
St. Vincent and the Grenadines	VCT	7212.96	12245	12160			58			0.609902			0.727865	8.61654	13.5717									66.48		2.01007	129	3.35879	72.415			109827
Venezuela, RB	VEN				3.22796	2718.94	18	3.87	4.33921	0.286295	2.652	3.418	0.725773	10.3234	12.8161	0.4295		0.706	89.3	6.084	33.57	7.1	0.18928	63.89	2.54	5.50071	130	3.02385	72.128	33.7		29390409
British Virgin Islands	VGB																									7.24531						29577
Virgin Islands (U.S.)	VIR	35938																							2.122			0				107268
Vietnam	VNM	2365.62	7155.75	6620	4.35622	1423.69	35	3.08	6.17477	0.500783	1.919	3.151	0.692669	8.2	12.6923	0.350875	0.745	0.698	66.1	5.061	40.3076	5.5	0.185921	46.96		2.05757	47	2.98924	75.317	26.4	3.98	94596642
Vanuatu	VUT	3082.36	3121.11	3080			43						0.596848	6.84	11.4169	0.376					40.5701	6.47	0.223332	44.55	2.961	0.527	116	0.550825	70.323	15.9		285510
Samoa	WSM	4258.49	6495.39	6290									0.706771	10.5949	12.52	0.398			64.2					54.5		1.26296	116	0.104139	73.187	11.3		195352
Kosovo	XKX	4045.61	10530.5	10740		2818.34	39				2.007	2.564				0.2774				5.401					0.67	5.03152	38					1791003
Yemen, Rep.	YEM	882.396			2.87479	219.8	16	2.07	4.59301		3.412	3.937	0.462717	3.2	8.66439	0.37		0.516	113.5	3.724	22.7543	4.1	0.387313		3.151	0.39048	35	19.5735	66.096			27834821
South Africa	ZAF	6132.48	12703.4	12320	4.32126	4197.91	43	7.24	7.06627	0.588066	2.324	2.767	0.704937	10.2406	13.6679	0.62875	0.867	0.756	71.1	4.459	15.869	5.1	0.33274	44.73	0.947	8.48066	100	1.44546	63.857	25.9	2.94	57000451
Zambia	ZMB	1534.87	3485	3330	3.51763	717.349	37	5.68	6.42514	0.472209	1.786	3.289	0.591462	7.10418	12.061	0.572	0.81		85.7	4.795	25.2242	5	0.408122	50.97	1.074	0.314183	65	19.3029	63.51		2.99	16853688
Zimbabwe	ZWE	1548.17	3028.25	2760	3.32045	609.126	22	3.16	5.39232	0.372762	2.352	3.946	0.5631	8.34225	10.4511	0.435667	0.73	0.717	99.5	4.193	22.1125	5	0.366085	43.41		0.782777	61	24.9307	61.195	34.7	2.84	14236745

## Sheet: score and rank
Country	Dim.1	Dim.2	Dim.3	Dim.4		Score	Rank
NOR	7.88605	1.20103	-0.129346	1.07052		8.14591	1
DNK	6.83365	1.0465	-0.476684	0.5407		7.81613	2
NLD	6.3027	0.901405	-0.219187	-0.0837557		7.50705	3
NZL	6.08263	1.0331	-0.829166	0.940805		7.00409	4
SWE	7.08597	0.718064	-0.148996	0.963948		6.98909	5
FIN	7.03841	0.446917	-0.246393	0.98893		6.74279	6
GBR	5.1146	0.826883	-0.347285	0.0100045		6.27876	7
ESP	3.43744	0.965981	-0.786959	-1.07441		6.26479	8
AUT	5.68312	0.387245	-0.101599	0.18949		5.98247	9
DEU	5.96946	0.229888	-0.0496387	0.438616		5.81038	10
CRI	1.03047	3.53968	-0.600558	-0.235342		5.40604	11
BEL	5.42304	-0.922891	-0.394005	-0.10645		5.00061	12
SVN	3.69341	-1.25545	-1.64596	-0.720912		4.80483	13
JPN	4.20458	-0.826435	-0.668482	-0.693109		4.73974	14
URY	1.13743	1.88096	-1.33493	-0.251607		4.60493	15
AUS	6.56389	-1.26041	0.199676	0.810347		4.29345	16
CZE	3.78104	-1.1711	-0.537358	-0.701766		3.84906	17
CAN	6.36036	-0.954242	0.720559	1.43392		3.25163	18
PRT	2.39309	-0.669728	-1.38262	-0.0388525		3.14484	19
ALB	-1.25954	0.0943167	-1.93462	-2.30403		3.07344	20
HUN	0.899027	-1.67932	-1.76897	-1.88135		2.87002	21
CHL	1.95272	1.43103	0.232547	0.529406		2.6218	22
PAN	0.0152929	2.73476	0.406665	-0.0807072		2.4241	23
POL	2.32692	-0.718575	-0.128839	-0.448163		2.18535	24
ROU	0.487292	-0.49395	-1.19408	-0.88877		2.0762	25
KOR	3.59718	-1.39274	0.75618	-0.0361411		1.4844	26
EST	3.57708	-2.70337	-0.703559	0.478007		1.09926	27
GRC	1.02646	-1.1699	0.108618	-1.09757		0.845508	28
MEX	-1.19553	2.5448	1.56943	-0.973432		0.753281	29
SRB	-0.932126	-0.89824	-0.723938	-1.27565		0.169219	30
BGR	0.141988	-1.95336	-1.42505	-0.436661		0.0503377	31
COL	-2.09208	2.91382	1.23934	-0.42837		0.0107713	32
PER	-1.70623	1.55392	-0.0101016	-0.0715812		-0.0706277	33
SLV	-3.26911	1.60214	-0.447754	-0.538206		-0.681006	34
BRA	-1.49071	2.55415	1.6756	0.117145		-0.729301	35
MKD	-1.5398	-1.29766	-0.680318	-1.32209		-0.835056	36
USA	5.14838	-1.05846	2.83912	2.08876		-0.83796	37
GEO	-1.65824	-0.617271	-0.539447	-0.888343		-0.847724	38
LKA	-3.14297	0.116139	-0.123197	-1.96214		-0.941501	39
KGZ	-4.0852	-0.198426	-0.497598	-1.70906		-2.07697	40
THA	-2.14847	1.83886	2.21221	-0.443415		-2.07841	41
IDN	-3.09965	1.27756	0.0576781	0.228808		-2.10858	42
BGD	-5.83048	0.78212	-1.28426	-1.62383		-2.14027	43
TUN	-3.04262	-0.352806	-0.137994	-0.857113		-2.40032	44
PHL	-3.45965	1.59994	0.451347	0.269729		-2.58079	45
TUR	-1.85373	-0.178106	2.51108	-1.23015		-3.31276	46
CHN	-2.40121	-0.76781	2.17097	-0.607216		-4.73277	47
UKR	-2.85338	-1.08684	2.18172	-1.15549		-4.96645	48
NPL	-6.43006	0.201125	-1.85481	0.861345		-5.23546	49
MNG	-2.08691	-3.08	-0.86888	1.22879		-5.52682	50
KAZ	-0.591904	-2.43397	3.11895	0.112329		-6.25716	51
GHA	-5.48623	-0.245487	-1.93878	2.75422		-6.54716	52
PAK	-7.88334	-0.176058	-0.292077	-1.09934		-6.66799	53
RUS	-1.10302	-1.95864	4.12472	-0.306762		-6.87962	54
EGY	-5.239	-1.22751	2.418	-1.85195		-7.03256	55
TZA	-7.25976	-0.809944	-2.39195	1.36327		-7.04102	56
SEN	-6.8811	-0.259103	-1.81545	1.91854		-7.24329	57
IND	-5.83442	0.453481	-0.362891	2.32032		-7.33837	58
ZAF	-3.40723	-0.194105	1.77568	3.26711		-8.64412	59
NGA	-8.21659	-0.0309942	0.301492	2.17115		-10.7202	60
CMR	-7.71339	-0.832901	-0.0478236	2.32752		-10.826	61
